# Supplementary material for: Exploration of the Hsa-miR-1587–Protein Interaction and the Inhibition to CASK
Source: MDPI journal article supplement (doi:10.3390/ijms221910716), 2021-10-03
Supplement: s1 [file s1]

## Supporting Information

### Exploration of the hsa-miR-1587-protein interaction and the inhibition to CASK

Lulu Zhang<sup>1,2</sup>, Jiang Zhou<sup>2,\*</sup>, Ming Xu<sup>3</sup> and Gu Yuan<sup>2</sup>

<sup>1</sup> Research Center of Basic Medicine, Jinan Central Hospital affiliated to Shandong First Medical University, Jinan 250013, China; zhanglulu@pku.edu.cn

<sup>2</sup> Beijing National Laboratory for Molecular Sciences, Department of Chemical Biology, College of Chemistry and Molecular Engineering, Peking University, Beijing 100871, China; guyuan@pku.edu.cn

<sup>3</sup> Key Laboratory of Cardiovascular Molecular Biology and Regulatory Peptides of Ministry of Health, Key Laboratory of Molecular Cardiovascular Sciences of Ministry of Education, Department of Cardiology, Institute of Vascular Medicine, Peking University Third Hospital, Beijing 100191, China; xuminghi@bjmu.edu.cn

\* Correspondence: zhoujiang@pku.edu.cn

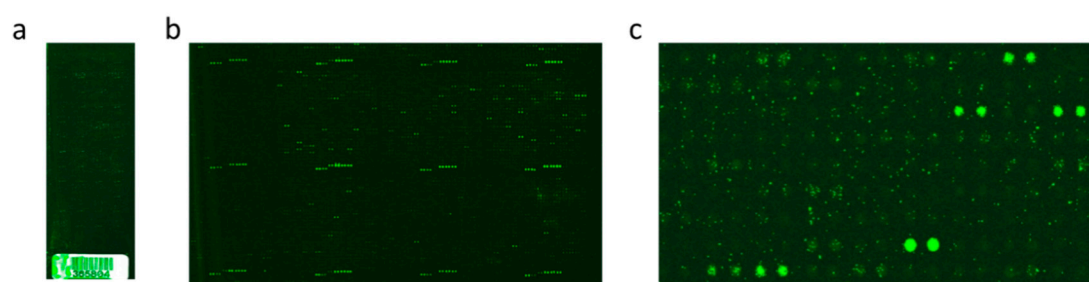

**Figure S1.** The imaging results of human proteome microarray assay with miR-1587 G-quadruplex structure. (a) overview of whole microarray assay (b) different blocks which contain control samples to indicate quality and parallelism (c) enlarged detail of microarray assay, duplicate for each protein.

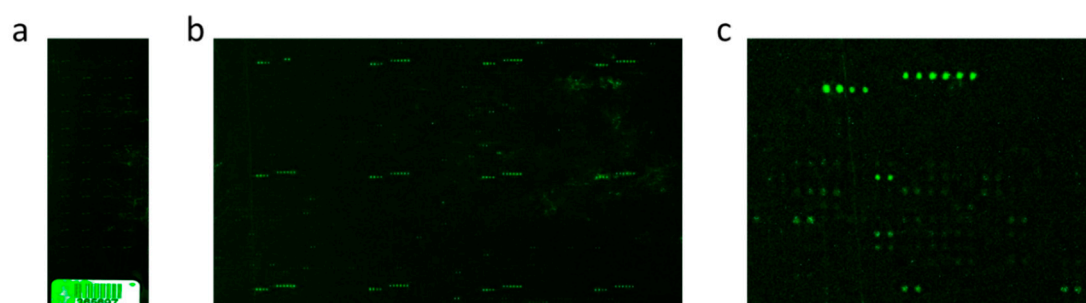

**Figure S2.** The imaging results of human proteome microarray assay with miR-1587 free form structure. (a) overview of whole microarray assay (b) different blocks which contain control samples to indicate quality and parallelism (c) enlarged detail of microarray assay, duplicate for each protein.

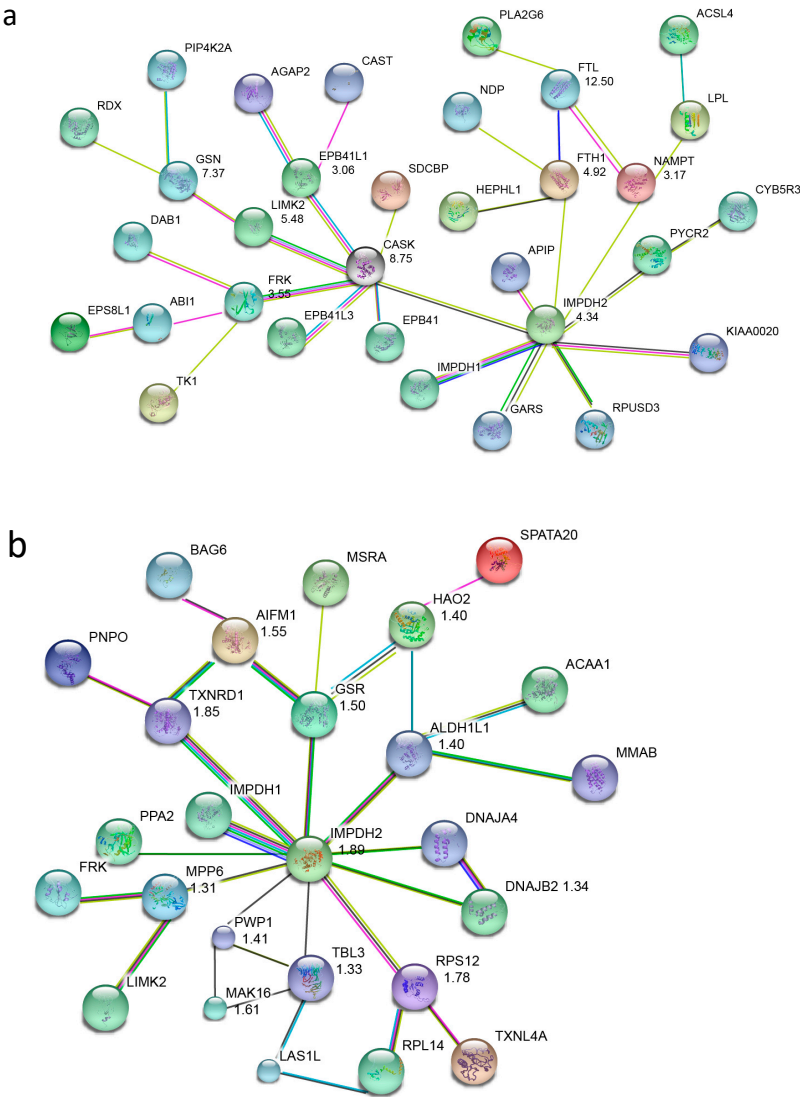

**Figure S3.** STRING analysis of binding proteins. (a) miR-1587 G-quadruplex binding proteins' enriched functional network (b) free form miR-1587 binding proteins' enriched functional network. Even though there were 182 and 133 binding proteins were considered to be strong binding proteins, most of them could not join into the same interaction network. After removing the isolated molecules, the left binding proteins were kept in the tightly connected network. As shown in (a), the patten displayed the network of miR-1587 G-quadruplex binding proteins. With FTL, CASK and IMPDH2 as nodes, there were many proteins that could interact with them, and these proteins were mainly concentrated in the functional processes related to binding, such as nucleic acid binding, heterocyclic compound binding, circular organic compound binding, etc. In contrast, the free form miR-1587 binding protein network was centered on IMPDH2, ALDH1L1 and GSR, and less members were recruited compared to miR-1587 G-quadruplex binding proteins. In conclusion, different miR-1587 structures could bind to different proteins and they may exhibit different influences and functions in cells.

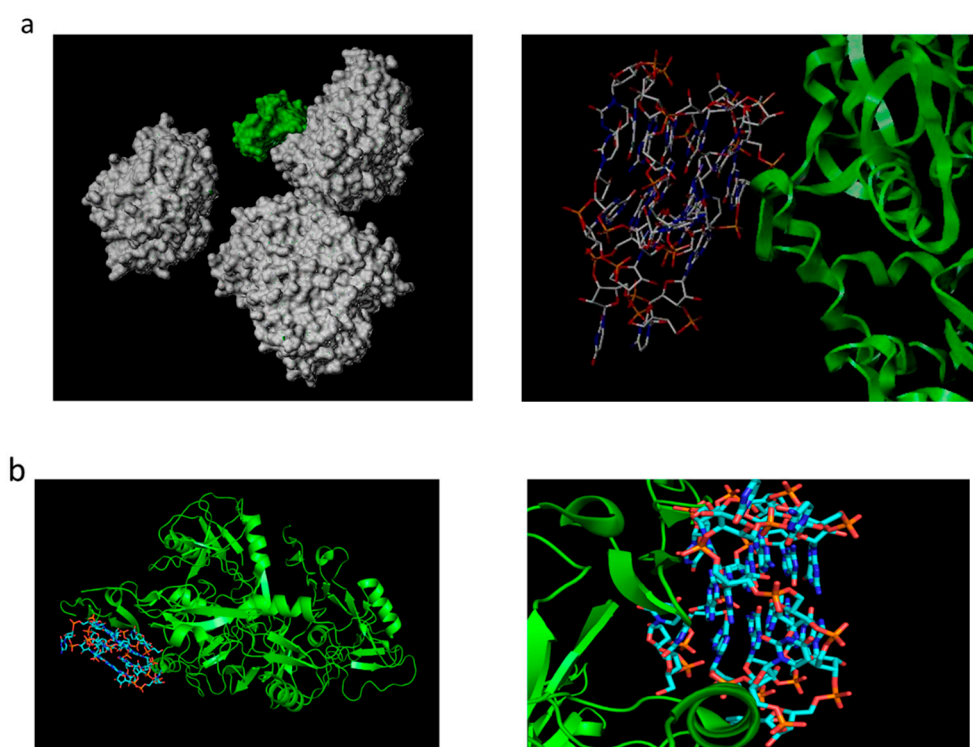

c

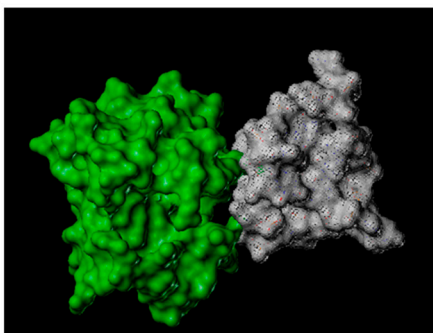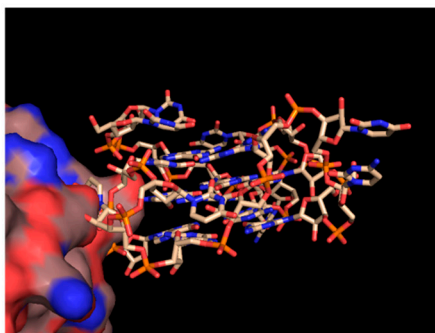

d

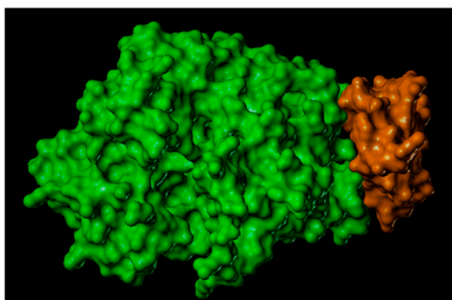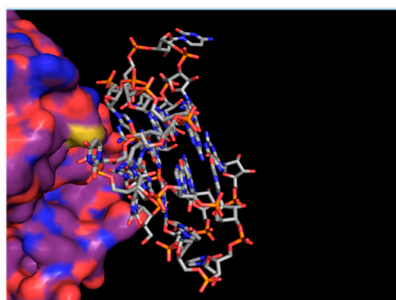

e

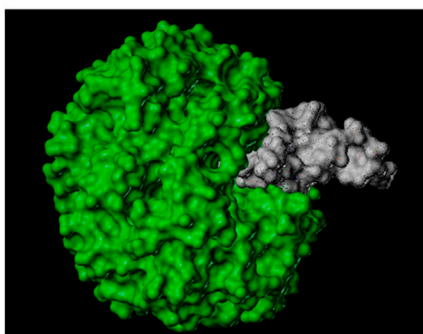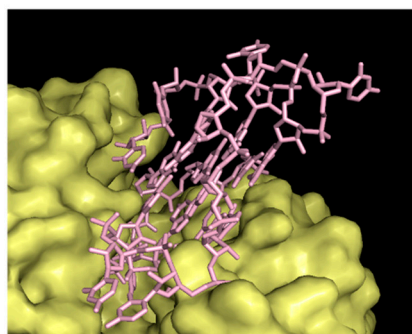

f

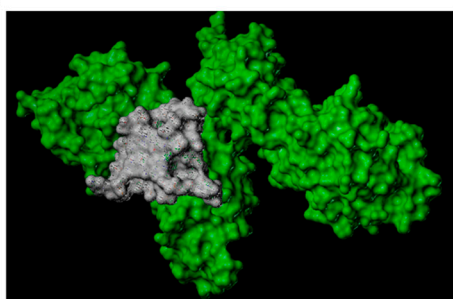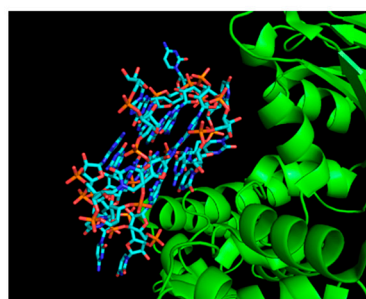

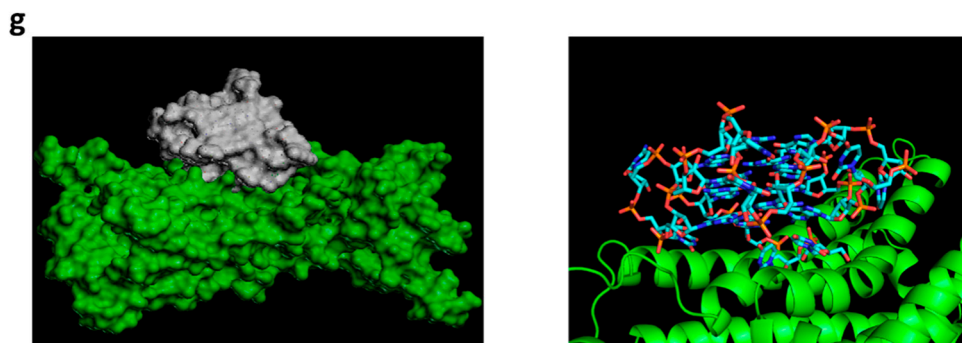

**Figure S4.** Computer simulation result of miR-1587 G-quadruplex and seven proteins. Left pictures: overview of proteins and miR-1587 G-quadruplex, right pictures: binding details between proteins and G-quadruplex. (a) P22830, ferrochelatase, catalyzes ferrous insertion into protoporphyrin IX. (b) P16109, p-selectin,  $\text{Ca}^{2+}$ -dependent receptor, regulates the interaction between platelets and leukocytes. (c) O95989, diphosphoinositol polyphosphate phosphohydrolase 1, trans-element for ERK pathway. (d) P08397, porphobilinogen deaminase, catalyzes the reaction from porphobilinogen to hydroxymethylbilane. (e) P69905, hemoglobin subunit alpha, essential for oxygen transport. (f) Q9UNQ2, dimethyladenosine transferase, related to demethylation of two adjacent adenosines. (g) P08172, muscarinic acetylcholine receptor M2, regulates cellular responses.

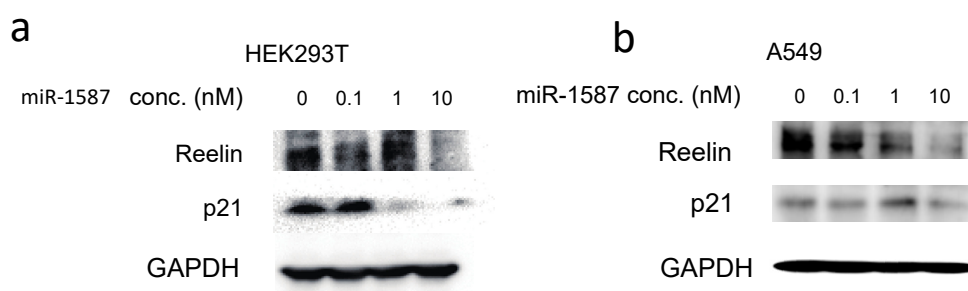

**Figure S5.** The Western blot assay to check CASK target genes Reelin and p21 expression in HEK293T cell line (a) and A549 cell line (b). Brief trend of Reelin/p21 was negatively regulated by miR-1587 could be noticed in all cell lines.

**Table S1.** 182 kinds of miR-1587 G-quadruplex binding proteins

| Name    | ID            | SNR   |
|---------|---------------|-------|
| ND      | NM_138362.1   | 19.87 |
| FTL     | NM_000146.3   | 12.50 |
| ACSL4   | NM_022977.1   | 12.49 |
| ZBTB2   | ZBTB2         | 12.11 |
| FFAR2   | BC096201.1    | 10.55 |
| CAMKK2  | BC026060.2    | 10.45 |
| TPM2    | NM_003289.3   | 10.32 |
| CPNE4   | NM_130808.1   | 10.21 |
| HNRNPC  | BC008364.1    | 9.06  |
| CASK    | NM_001126054. | 8.75  |
| THYN1   | BC093074.1    | 7.66  |
| CPNE6   | NM_006032.2   | 7.65  |
| BZW2    | NM_014038.1   | 7.52  |
| RALYL   | BC031090.1    | 7.39  |
| GSN     | BC026033.1    | 7.37  |
| DCDC2   | Q9UHG0        | 7.12  |
| Supt6   | BC072657      | 6.88  |
| PYCR2   | NM_013328.2   | 6.70  |
| DCDC2   | BC050704.1    | 6.15  |
| NFKB2   | BC002844.2    | 6.13  |
| VWA8    | NM_001009814. | 6.10  |
| ND      | NM_017949.1   | 6.10  |
| JMJD6   | NM_015167.2   | 6.07  |
| MMAB    | NM_052845.2   | 6.02  |
| EPB41   | BC039079.1    | 5.98  |
| HNRNPC  | BC007052.1    | 5.93  |
| TCOF1   | NM_001008657. | 5.90  |
| ND      | NM_004537.3   | 5.87  |
| ZNF641  | BC018090.1    | 5.76  |
| MTERFD2 | NM_182501.2   | 5.73  |
| IMPDH1  | P20839        | 5.72  |
| ARL6IP4 | BC001958.1    | 5.71  |
| SDCBP   | NM_001007069. | 5.58  |
| CAP1    | NM_006367.2   | 5.56  |
| RASGRP3 | NM_170672.1   | 5.55  |
| ZNF207  | ID            | 5.54  |
| SPSB2   | NM_001032293. | 5.51  |
| MTERFD2 | NM_032641.1   | 5.51  |
| TAF7    | BC053533.1    | 5.51  |

| Name     | NM_005642.2   | SNR  |
|----------|---------------|------|
| LIMK2    | NM_001031801. | 5.48 |
| FTL      | BC016715.1    | 5.25 |
| REEP6    | NM_138393.1   | 5.19 |
| USP7     | NM_003470     | 5.16 |
| EPS8L1   | NM_139204.1   | 5.11 |
| ASAP2    | NM_003887.1   | 5.08 |
| TIMELESS | NM_003920.2   | 5.08 |
| CPNE2    | NM_152727.4   | 4.98 |
| C18orf54 | BC036054.2    | 4.97 |
| FTH1     | BC066341.1    | 4.92 |
| ACOT7    | NM_181864.2   | 4.90 |
| DNAJA4   | BC031044.1    | 4.86 |
| PALD1    | NM_014431.1   | 4.86 |
| RALY     | BC103753.1    | 4.85 |
| PSMA3    | NM_002788.2   | 4.84 |
| APIP     | BC017594.2    | 4.78 |
| ND       | NM_004811.1   | 4.77 |
| YBX3     | BC009744.2    | 4.63 |
| FTL      | BC013928.1    | 4.62 |
| THAP6    | NM_144721.3   | 4.50 |
| GARS     | BC007722.2    | 4.46 |
| EEF1G    | BC013918.1    | 4.45 |
| LUC7L    | NM_018032.3   | 4.35 |
| IMPDH2   | NM_000884.2   | 4.34 |
| ABI1     | NM_001012752. | 4.29 |
| SPP1     | BC093033.1    | 4.27 |
| SSBP1    | BC093054.1    | 4.27 |
| UBE2D3   | BC066917.1    | 4.26 |
| TFAP2E   | NM_178548.2   | 4.26 |
| TPD52L3  | NM_001001875. | 4.23 |
| TAF7     | BC032737      | 4.22 |
| ND       | ND            | 4.21 |
| HEPHL1   | NM_001098672. | 4.18 |
| FAM109B  | BC104176.1    | 4.16 |
| PRKCDBP  | ID            | 4.14 |
| LARP4B   | BC011585.1    | 4.12 |
| VMA21    | NM_015155.1   | 4.12 |
| ZNF687   | NM_001017980. | 4.11 |
| DCAF8    | BC032463      | 4.10 |
| LETM1    | NM_015726.2   | 4.10 |

| Name     | NM_012318.1   | SNR  |
|----------|---------------|------|
| GPS1     | NM_212492.1   | 4.08 |
| CLDN8    | NM_199328.1   | 4.08 |
| PSMA3    | BC029402.1    | 4.04 |
| LPL      | BC011353.1    | 4.03 |
| AIFM1    | NM_004208.2   | 4.02 |
| DMRT2    | DMRT2         | 4.01 |
| ND       | NM_182684.1   | 3.99 |
| MARCKSL1 | BC066915.1    | 3.98 |
| HNRNPU   | BC015782.1    | 3.97 |
| C11orf45 | NM_145013.1   | 3.97 |
| OPA3     | BC047316.1    | 3.93 |
| COLEC10  | NM_006438.2   | 3.91 |
| LACE1    | NM_145315.3   | 3.88 |
| CKM      | BC007462.1    | 3.86 |
| CATSPERD | BC043005.1    | 3.85 |
| ZNF358   | BC014002.1    | 3.83 |
| FMO5     | BC035687.1    | 3.80 |
| MAGEA9   | BC002351      | 3.80 |
| VPS16    | BC073959.1    | 3.79 |
| SERPINE2 | BC042628.1    | 3.79 |
| PRRC2B   | BC012289.1    | 3.78 |
| PIP4K2A  | NM_005028.3   | 3.75 |
| SMIM11   | NM_058182.3   | 3.75 |
| ANKRD7   | BC032799.1    | 3.72 |
| PTGES3L- | NM_025267.2   | 3.70 |
| PKM      | BC035198.1    | 3.65 |
| GSN      | ENST000003412 | 3.65 |
| XRCC4    | NM_022406.1   | 3.64 |
| ANKRD44  | BC016985.2    | 3.64 |
| C6orf141 | BC036917.1    | 3.63 |
| BEGAIN   | NM_020836.2   | 3.62 |
| 42622    | BC021192.2    | 3.60 |
| CENPP    | ID            | 3.59 |
| LRRC6    | NM_001012267. | 3.58 |
| FRK      | BC027589.1    | 3.55 |
| TFAP2D   | NM_002031.2   | 3.54 |
| SMN2     | NM_172238.1   | 3.51 |
| TEX264   | NM_017411.2   | 3.51 |
| VPS53    | NM_015926.3   | 3.51 |
| RTN4IP1  | BC029560.1    | 3.51 |



| Name     | NM_032730.3   | SNR  |
|----------|---------------|------|
| HSD17B2  | NM_002153.1   | 3.50 |
| IKZF1    | XM_371901.1   | 3.50 |
| SARS2    | NM_017827.2   | 3.49 |
| AKAP8L   | NM_014371.2   | 3.49 |
| TK1      | BC007872.2    | 3.49 |
| FAM115A  | NM_014719.1   | 3.47 |
| ZNF562   | BC109062      | 3.46 |
| PLA2G6   | NM_001004426. | 3.44 |
| PACSLN1  | NM_020804.2   | 3.42 |
| EIF4B    | BC098437.1    | 3.42 |
| DNAJB5   | NM_012266.3   | 3.41 |
| RDX      | BC047109.1    | 3.39 |
| ZFP64    | BC012759.2    | 3.38 |
| KCNJ1    | NM_153765.1   | 3.35 |
| GSTA3    | BC020619.1    | 3.35 |
| HSCB     | NM_172002.3   | 3.34 |
| CYB5R3   | NM_000398.4   | 3.34 |
| ND       | BC089417.1    | 3.34 |
| SPATA20  | NM_022827.2   | 3.34 |
| MRPL1    | BC015109.1    | 3.33 |
| FGD5     | BC035364.1    | 3.33 |
| H1FX     | NM_006026.2   | 3.33 |
| MRPS28   | NM_014018.2   | 3.32 |
| MAK16    | NM_032509.2   | 3.31 |
| RPS6KA2  | NM_021135.4   | 3.30 |
| GSTM4    | NM_000850.3   | 3.28 |
| SRPX2    | BC020733.1    | 3.27 |
| CPSF4    | NM_001081559. | 3.27 |
| CAST     | NM_173060.2   | 3.26 |
| PKNOX1   | NM_004571.3   | 3.25 |
| ND       | ID            | 3.24 |
| ST3GAL3  | ENST000003617 | 3.24 |
| ODF3L1   | NM_006279.2   | 3.23 |
| TCF7L1   | NM_175881.2   | 3.22 |
| IGHG1    | TCF7L1        | 3.22 |
| IGIP     | BC092518.1    | 3.21 |
| 42621    | NM_001007189. | 3.20 |
| TFDP3    | BC001329.1    | 3.20 |
| IRAK1BP1 | BC117336      | 3.19 |
| AGAP2    | NM_001010844. | 3.19 |

| Name     | BC028020.1    | SNR  |
|----------|---------------|------|
| ZNF383   | NM_152604.1   | 3.17 |
| NAMPT    | BC072439.1    | 3.17 |
| UBE2N    | NM_003348.3   | 3.13 |
| PDXDC1   | BC060871.1    | 3.13 |
| RTN2     | NM_206901.1   | 3.12 |
| MIF4GD   | NM_020679.2   | 3.12 |
| MRTO4    | NM_016183.2   | 3.11 |
| DAZ2     | BC113006      | 3.10 |
| QKI      | NM_206855.1   | 3.10 |
| RPUSD3   | NM_173659.2   | 3.10 |
| OSBPL8   | NM_001003712. | 3.09 |
| EPB41L3  | BC006141.1    | 3.09 |
| DAB1     | BC067447.1    | 3.08 |
| LPL      | NM_000237.1   | 3.08 |
| KDM1A    | BC040194.2    | 3.08 |
| EPB41L1  | NM_177996.1   | 3.06 |
| ADAMTSL4 | BC027478.1    | 3.06 |
| C1QL2    | NM_182528.3   | 3.06 |
| WISP2    | BC058074.1    | 3.04 |
| CNP      | NM_033133.4   | 3.03 |
| KIAA0020 | BC016137.2    | 3.02 |
| LRAT     | NM_004744.3   | 3.02 |
| PRM1     | NM_002761.1   | 3.00 |

**Table S2.** 133 kinds of free form miR-1587 binding proteins

| Name        | ID             | SNR  |
|-------------|----------------|------|
| FTL         | NM_000146.3    | 4.38 |
| CCDC130     | NM_030818.2    | 4.32 |
| NAA16       | NM_018527.2    | 3.72 |
| BIRC5       | BC008718.2     | 3.69 |
| LPPR1       | NM_017753.2    | 2.77 |
| FTL         | BC016715.1     | 2.65 |
| PIK3R3      | NM_003629.2    | 2.60 |
| BAG6        | NM_080702.1    | 2.57 |
| COMMD10     | NM_016144.2    | 2.54 |
| ACAA1       | NM_001607.2    | 2.50 |
| FTL         | BC021670.1     | 2.45 |
| KDELC1      | NM_024089.1    | 2.43 |
| PPA2        | NM_006903.4    | 2.39 |
| ENPP7       | BC041453.1     | 2.37 |
| TIMM8B      | NM_012459.1    | 2.33 |
| MFSD8       | NM_152778.1    | 2.32 |
| OCIAD1      | NM_017830.1    | 2.27 |
| CCL16       | NM_004590.2    | 2.27 |
| ACSL4       | NM_022977.1    | 2.26 |
| FTH1        | BC066341.1     | 2.23 |
| RDH11       | BC051291.1     | 2.21 |
| PRRC2B      | BC012289.1     | 2.20 |
| ND          | NM_004811.1    | 2.20 |
| TMED5       | BC038511.1     | 2.18 |
| UQCRH       | NM_006004.2    | 2.17 |
| HMBS        | NM_001024382.1 | 2.15 |
| PYCR2       | NM_013328.2    | 2.13 |
| CASP2       | BC002427.2     | 2.10 |
| HMBS        | NM_000190.3    | 2.08 |
| ISY1        | NM_020701.1    | 2.08 |
| VHL         | BC058831.1     | 2.01 |
| FTL         | BC013928.1     | 2.01 |
| PHF23       | NM_024297.2    | 2.01 |
| RPL14       | BC009294.2     | 2.01 |
| BABAM1      | NM_001033549.1 | 1.99 |
| SPON1       | NM_006108.3    | 1.98 |
| hCG_1778643 | BC035666.1     | 1.94 |

| Name      | ID              | SNR  |
|-----------|-----------------|------|
| ND        | NM_004284.2     | 1.93 |
| IMPDH1    | P20839          | 1.92 |
| VMA21     | NM_001017980.1  | 1.91 |
| DCDC2     | BC050704.1      | 1.91 |
| IMPDH2    | NM_000884.2     | 1.89 |
| CCDC153   | NM_001033658.1  | 1.88 |
| FAM81A    | NM_152450.1     | 1.86 |
| PNPO      | NM_018129.1     | 1.85 |
| TXNRD1    | NM_182729.1     | 1.85 |
| LINC00311 | BC030801.1      | 1.85 |
| HLA-DQB1  | BC012106.1      | 1.84 |
| PKM       | BC035198.1      | 1.80 |
| FFAR2     | BC096201.1      | 1.78 |
| RPS12     | NM_001016.3     | 1.78 |
| ACRC      | NM_052957.2     | 1.75 |
| LIMK2     | NM_001031801.1  | 1.74 |
| PSMA3     | NM_002788.2     | 1.72 |
| PALD1     | NM_014431.1     | 1.71 |
| B3GALNT1  | BC028571.1      | 1.70 |
| IRAK1BP1  | NM_001010844.1  | 1.69 |
| CAMKK2    | BC026060.2      | 1.68 |
| WNT6      | NM_006522.3     | 1.67 |
| Blank     | Blank           | 1.67 |
| DNAJA4    | BC031044.1      | 1.65 |
| Blank     | Blank           | 1.65 |
| HEPHL1    | NM_001098672.1  | 1.64 |
| SPATA20   | NM_022827.2     | 1.64 |
| SPDL1     | NM_017785.2     | 1.62 |
| MAK16     | BC039740.1      | 1.61 |
| ND        | NM_030593.1     | 1.60 |
| BZW2      | NM_014038.1     | 1.59 |
| COMT      | NM_007310.1     | 1.55 |
| KRT8P41   | BC093663.1      | 1.55 |
| AIFM1     | NM_004208.2     | 1.55 |
| ATG16L1   | ENST00000347464 | 1.54 |
| CD3D      | NM_000732.4     | 1.52 |
| FBXO25    | NM_012173.3     | 1.52 |
| C18orf54  | BC036054.2      | 1.52 |
| ND        | BC012848.1      | 1.51 |

| Name        | ID          | SNR  |
|-------------|-------------|------|
| IGHG1       | BC006402.1  | 1.50 |
| GSR         | NM_000637.2 | 1.50 |
| SULT4A1     | BC030665.1  | 1.49 |
| NKD1        | NM_033119.3 | 1.47 |
| HOXC5       | NM_018953.2 | 1.47 |
| ANXA6       | NM_001155.3 | 1.46 |
| EPS8L1      | NM_139204.1 | 1.45 |
| DTNB        | BC049366.1  | 1.45 |
| NFE2L3      | NM_004289.5 | 1.45 |
| SCCPDH      | BC026185.2  | 1.43 |
| ZRANB1      | BC048281.1  | 1.43 |
| MDM1        | BC022042.1  | 1.42 |
| MSRA        | NM_012331.2 | 1.42 |
| CAP1        | NM_006367.2 | 1.42 |
| PPFIBP2     | NM_003621.1 | 1.42 |
| SERPINE2    | BC042628.1  | 1.42 |
| NECAB1      | BC016340.1  | 1.41 |
| KLHL36      | NM_024731.2 | 1.41 |
| HDAC1       | NM_004964.2 | 1.41 |
| FAM114A1    | BC001096.2  | 1.41 |
| APITD1      | NM_199295.1 | 1.40 |
| ALDH1L1     | BC027241.1  | 1.40 |
| FRK         | NM_002031.2 | 1.40 |
| PWP1        | BC001652.2  | 1.40 |
| ACPP        | NM_001099.2 | 1.40 |
| LRP12       | BC017381.1  | 1.40 |
| MIF4GD      | NM_020679.2 | 1.40 |
| C6orf141    | BC036917.1  | 1.40 |
| TXNL4A      | NM_006701.2 | 1.40 |
| MIR4435-1HG | BC014776.1  | 1.39 |
| ZFP64       | BC012759.2  | 1.39 |
| ZCCHC13     | NM_203303.1 | 1.39 |
| ND          | NM_182684.1 | 1.38 |
| LDB2        | NM_001290.2 | 1.38 |
| MPLKIP      | NM_138701.1 | 1.37 |
| SEPT8       | BC001329.1  | 1.37 |
| C11orf45    | NM_145013.1 | 1.35 |
| GYG2        | BC023152.1  | 1.34 |
| PSMC3       | NM_002804.3 | 1.34 |

| Name    | ID             | SNR  |
|---------|----------------|------|
| ST3GAL3 | NM_006279.2    | 1.34 |
| DNAJB2  | NM_001039550.1 | 1.34 |
| HN1     | NM_016185.2    | 1.33 |
| AP3S2   | NM_005829.3    | 1.33 |
| MAGEA9  | BC002351       | 1.33 |
| TBL3    | BC035409.1     | 1.33 |
| FAM115A | NM_014719.1    | 1.33 |
| MMAB    | NM_052845.2    | 1.31 |
| C2orf15 | NM_144706.2    | 1.31 |
| MPP6    | BC023638       | 1.31 |
| Dmrt2   | BC027669       | 1.30 |
| LAS1L   | BC019302.1     | 1.30 |
| OR8B4   | NM_001005196.1 | 1.30 |
| CYP2U1  | BC012027.1     | 1.30 |
| HAO2    | NM_001005783.1 | 1.30 |
| SERTM1  | NM_203451.1    | 1.30 |
| SEMA6C  | NM_030913.3    | 1.30 |
| EFHC1   | BC020210.1     | 1.30 |
